# Supplementary material for: CVnCoV and CV2CoV protect human ACE2 transgenic mice from ancestral B BavPat1 and emerging B.1.351 SARS-CoV-2
Source: Springer Nature journal article supplement (doi:10.1038/s41467-021-24339-7), 2021-06-30
Supplement: 41467_2021_24339_MOESM1_ESM.pdf [file 41467_2021_24339_MOESM1_ESM.pdf]

1 **Supplemental Material**

2

3 **CVnCoV and CV2CoV protect human ACE2 transgenic mice from ancestral B BavPat1 and**  
4 **emerging B.1.351 SARS-CoV-2**

5

6

7 Table S1: Experimental and control groups.

| group | No. of animals             | Vaccine                          | Dose, volume, route                             | Dosing | Serum collection | Challenge infection |        | End of the study |
|-------|----------------------------|----------------------------------|-------------------------------------------------|--------|------------------|---------------------|--------|------------------|
| I     | K18-hACE2 mice Female n=10 | CVnCoV                           | 8 µg, 20 µl, i.m.                               | d0, 28 | d0, d28, d55     | BavPat1             |        | d69 (10dpc)      |
| II    |                            |                                  | 8 µg, 20 µl, i.m.                               |        |                  |                     | B1.351 |                  |
| III   |                            | CV2CoV                           | 0.5 µg, 20 µl, i.m.                             |        |                  | BavPat1             |        |                  |
| IV    |                            |                                  | 0.5 µg, 20 µl, i.m.                             |        |                  |                     | B1.351 |                  |
| V     |                            | CV2CoV                           | 2 µg, 20 µl, i.m.                               |        |                  | BavPat1             |        |                  |
| VI    |                            |                                  | 2 µg, 20 µl, i.m.                               |        |                  |                     | B1.351 |                  |
| VII   |                            | CV2CoV                           | 8 µg, 20 µl, i.m.                               |        |                  | BavPat1             |        |                  |
| VIII  |                            |                                  | 8 µg, 20 µl, i.m.                               |        |                  |                     | B1.351 |                  |
| IX    |                            | Formalin-inactivated virus +Alum | 10 <sup>6</sup> TCID <sub>50</sub> , 20µl, i.m. |        |                  | BavPat1             |        |                  |
| X     |                            |                                  | 10 <sup>6</sup> TCID <sub>50</sub> , 20µl, i.m. |        |                  |                     | B1.351 |                  |
| XI    | n=5                        | Sham (NaCl)                      | -, 20 µl, i.m.                                  |        |                  | BavPat1             |        |                  |
| XII   |                            |                                  | -, 20 µl, i.m.                                  |        |                  |                     | B1.351 |                  |

8

9

10 Table S2. sVNT results of serum samples from day 28

| <b>Group</b> | <b>Median</b> | <b>IQR</b>  | <b>p-value</b> |
|--------------|---------------|-------------|----------------|
| Sham         | 6.83          | 3.69-7.94   | N/A            |
| FI -Virus    | 55.68         | 26.01-71.69 | N/A            |
| CVnCoV       | 94.83         | 93.89-95.27 | 0.0017         |
| CV2CoV 0.5µg | 93            | 88.69-95.34 | 0.03           |
| CV2CoV 2µg   | 96.01         | 95.52-96.27 | <0.0001        |
| CV2CoV 8µg   | 96.46         | 96.09-96.68 | <0.0001        |

11 IQR= interquartile range; P-values compare all RNA vaccine groups to the FI-Virus group and were  
 12 determined by nonparametric one-way ANOVA and Dunn's multiple comparisons test

13 Source data are provided as a Source Data file.

14

15

16 Table S3. Sequencing coverage of L4550 for mutations typically found in the spike protein gene of  
17 B.1.351 variants and the spike protein polybasic cleavage site.

| <b>B.1.351 mutations Spike</b> | <b>Coverage</b> | <b>Variant</b> |
|--------------------------------|-----------------|----------------|
| <b>L18F</b>                    | 8,584 reads     | None           |
| <b>D80A</b>                    | 6,361 reads     | None           |
| <b>D215G</b>                   | 9,898 reads     | None           |
| <b>Deletion 241-243</b>        | (9628 reads)    | None           |
| <b>K417N</b>                   | 8,606 reads     | None           |
| <b>E484K</b>                   | 9,094 reads     | None           |
| <b>N501Y</b>                   | 9,868 reads     | None           |
| <b>A701V</b>                   | 14,038 reads    | None           |
| <b>Cleavage site</b>           | 17,730 reads    | None           |

18

19

20 Table S4: Viral RNA genome content detected in swab samples (4 dpi), expressed as Cq values for  
 21 total RNA and subgenomic RNA. This table includes samples that were positive for total RNA, all  
 22 further swab samples scored negative.

| Vaccine  | Challenge | ID     | Genomic RNA | Subgenomic RNA |             |
|----------|-----------|--------|-------------|----------------|-------------|
|          |           |        |             | sgRNA E        | sgRNA ORF7a |
| FI virus | BavPat1   | FU5923 | 36.6        | nd             | nd          |
|          |           | QE7311 | 35.4        | nd             | nd          |
|          |           | VI9303 | 38.3        | nd             | nd          |
|          |           | KZ7407 | 37.9        | nd             | nd          |
|          | B.1.351.  | QE7312 | 37.8        | nd             | nd          |
|          |           | QE7300 | 36.0        | nd             | nd          |
|          |           | VK1621 | 36.2        | nd             | nd          |
|          |           | KZ7411 | 36.6        | nd             | nd          |
|          | VI9302    | 35.0   | nd          | nd             |             |
| sham     | BavPat1   | AO8979 | 32.9        | nd             | nd          |
|          |           | AO8971 | 35.4        | nd             | nd          |
|          |           | AO8960 | 32.5        | nd             | nd          |
|          |           | VK1079 | 36.3        | nd             | nd          |
|          | B.1.351.  | KZ7412 | 35.3        | nd             | nd          |
|          |           | VI9315 | 32.3        | nd             | 36.7        |
|          |           | VI9305 | 29.9        | 37.1           | 36.2        |
|          |           | KZ7416 | 36.6        | nd             | nd          |

23 nd: not detected

24

25 Table S5: Viral RNA genome content detected in organ samples (10 dpi or indicated dpi) from mice  
 26 challenged with the isolate BavPat1 (homologous spike), expressed as Cq value for total RNA and  
 27 subgenomic RNA. The table includes samples that were positive for total genomic RNA (Cq <40),  
 28 while all further organ samples scored negative.

| Vaccine       | Challenge     | ID            | Organ         | Genomic RNA   | Subgenomic RNA |             |      |      |
|---------------|---------------|---------------|---------------|---------------|----------------|-------------|------|------|
|               |               |               |               |               | sgRNA E        | sgRNA ORF7a |      |      |
| FI virus      | BavPat1       | FU5923        | Cerebellum    | 39.6          | nd             | nd          |      |      |
|               |               |               | Cerebrum      | 25.7          | 29.3           | 26.2        |      |      |
|               |               |               | Nasal conchae | 26.4          | 32.7           | 31.4        |      |      |
|               |               |               | Nasal conchae | 33.7          | nd             | nd          |      |      |
|               |               | QE7309        | Cerebellum    | 34.1          | nd             | 33.2        |      |      |
|               |               |               | Cerebrum      | 25.6          | 30.7           | 26.7        |      |      |
|               |               |               | Nasal conchae | 36.5          | nd             | nd          |      |      |
|               |               | KZ7402        | Nasal conchae | 28.1          | 35.8           | 33.2        |      |      |
|               |               | VI9304        | Cerebrum      | 39.5          | nd             | nd          |      |      |
|               |               |               | Trachea       | 32.5          | 39.1           | 38.4        |      |      |
|               |               | VI9303 (6dpc) | Cerebellum    | 31.4          | 38.7           | 32.9        |      |      |
|               |               |               | Cerebrum      | 19.4          | 24.7           | 21.4        |      |      |
|               |               |               | Nasal conchae | 27.6          | 37.1           | 32.5        |      |      |
|               |               |               | Trachea       | 37.8          | nd             | nd          |      |      |
|               |               |               | Lung caudal   | 32.3          | 38.5           | 35.7        |      |      |
|               |               |               | Lung cranial  | 30.1          | 36.9           | 34.2        |      |      |
|               |               | QE7311 (5dpc) | Cerebellum    | 22.6          | 27.5           | 25.3        |      |      |
|               |               |               | Cerebrum      | 15            | 20.7           | 18.2        |      |      |
|               |               |               | Nasal conchae | 32.6          | nd             | 36.7        |      |      |
|               |               |               | Trachea       | 30.7          | 37.6           | 38.8        |      |      |
|               |               |               | Lung caudal   | 31.9          | nd             | 37.3        |      |      |
|               |               |               | Lung cranial  | 31.1          | nd             | 34.1        |      |      |
|               |               | VK1634 (5dpc) | Cerebellum    | 28.5          | 30.8           | 28.1        |      |      |
|               |               |               | Cerebrum      | 13.1          | 18.1           | 15.5        |      |      |
|               |               |               | Nasal conchae | 30.2          | nd             | 37.7        |      |      |
|               |               |               | Trachea       | 33.3          | nd             | 36          |      |      |
|               |               |               | Lung caudal   | 24.8          | 30.3           | 27.4        |      |      |
|               |               |               | Lung cranial  | 24.4          | 29.8           | 27          |      |      |
|               |               | sham          | BavPat1       | AO8971 (7dpc) | Cerebellum     | 20.3        | 24.3 | 21.4 |
|               |               |               |               |               | Cerebrum       | 18.3        | 22.7 | 19.5 |
|               |               |               |               |               | Nasal conchae  | 32.8        | nd   | nd   |
|               |               |               |               |               | Trachea        | 36.4        | nd   | nd   |
|               |               |               |               |               | Lung caudal    | 30.3        | nd   | nd   |
|               |               |               |               |               | Lung cranial   | 27.3        | 32.1 | 29.4 |
|               |               |               |               | VK1079 (5dpc) | Cerebellum     | 22.3        | 35.4 | 23.2 |
|               |               |               |               |               | Cerebrum       | 13.6        | 18.6 | 16.4 |
| Nasal conchae | 26.2          |               |               |               | 34.7           | 30.4        |      |      |
| Trachea       | 31.4          |               |               |               | 36.9           | 34.7        |      |      |
| Lung caudal   | 21.9          |               |               |               | 27.1           | 23.5        |      |      |
| Lung cranial  | 30.6          |               |               |               | nd             | 33.8        |      |      |
| AO8960 (5dpc) | Cerebellum    |               |               | 17.2          | 20.4           | 18.5        |      |      |
|               | Cerebrum      |               |               | 16.2          | 18.1           | 5.9         |      |      |
|               | Nasal conchae |               |               | 27            | 30.3           | 29          |      |      |
|               | Trachea       |               |               | 35.8          | nd             | 40.5        |      |      |
|               | Lung caudal   |               |               | 21.4          | 26.1           | 23.1        |      |      |
|               | Lung cranial  |               |               | 23.3          | 28             | 25.4        |      |      |
| AO8979 (5dpc) | Cerebellum    |               |               | 15.7          | 19.9           | 17          |      |      |
|               | Cerebrum      |               |               | 15.3          | 19.3           | 16.9        |      |      |
|               | Nasal Conchae |               |               | 25.6          | 31.5           | 29.3        |      |      |
|               | Trachea       |               |               | 30.1          | 38.1           | 34.4        |      |      |

|                 |         |        |               |      |      |      |
|-----------------|---------|--------|---------------|------|------|------|
|                 |         |        | Lung caudal   | 21.5 | 25.3 | 22.8 |
|                 |         |        | Lung cranial  | 28.4 | 33.1 | 30   |
| CVnCoV          | BavPat1 | QE7304 | Nasal conchae | 38.2 | nd   | nd   |
|                 |         | FT9301 | Nasal conchae | 35.3 | nd   | nd   |
| CV2CoV 8µg      | BavPat1 | KY5549 | Nasal conchae | 38.7 | nd   | nd   |
| CV2CoV 2µg      | BavPat1 | VI9314 | Nasal conchae | 39.6 | nd   | nd   |
|                 |         | VI9316 | Trachea       | 37.7 | nd   | nd   |
|                 |         | KZ7417 | Nasal conchae | 32.6 | 39.6 | nd   |
|                 |         | VK1078 | Nasal conchae | 35   | nd   | nd   |
|                 |         | VK1072 | Nasal conchae | 39.1 | nd   | nd   |
| CV2CoV<br>0.5µg | BavPat1 | FT9319 | Nasal conchae | 36.1 | nd   | nd   |
|                 |         | FT9307 | Cerebellum    | 38.9 | nd   | nd   |
|                 |         |        | Nasal conchae | 36.3 | nd   | nd   |
|                 |         | KY5552 | Nasal conchae | 30.5 | 37.1 | 36.2 |

29 nd: not detected

30

31 Table S6: Viral RNA genome content detected in organ samples (10 dpi or indicated) from mice  
 32 challenged with the B.1.351. isolate (heterologous spike), expressed as Cq value for total genomic  
 33 RNA and subgenomic RNA. This table includes samples that resulted positive for total RNA (Cq  
 34 <40), while all further organ samples scored negative.

| Vaccine  | Challenge | ID            | Organ         | Genomic RNA | Subgenomic RNA |             |
|----------|-----------|---------------|---------------|-------------|----------------|-------------|
|          |           |               |               |             | sgRNA E        | sgRNA ORF7a |
| FI virus | B.1.351.  | QE7302        | Cerebrum      | 29          | 35.8           | 31.1        |
|          |           |               | Nasal conchae | 29.7        | 39.2           | 34.6        |
|          |           |               | Lung cranial  | 37.4        | nd             | nd          |
|          |           | VK1631        | Nasal conchae | 36.8        | nd             | nd          |
|          |           | QE7312        | Cerebellum    | 29.6        | 39.7           | 31.9        |
|          |           |               | Cerebrum      | 31.7        | nd             | 33.8        |
|          |           |               | Trachea       | 38.2        | nd             | nd          |
|          |           |               | Lung caudal   | 30.7        | 39.1           | 35.2        |
|          |           |               | Lung cranial  | 31.8        | 39.7           | 35.5        |
|          |           | KZ7403        | Nasal conchae | 29.1        | nd             | nd          |
|          |           | VI9309        | Cerebellum    | 33.9        | nd             | 34.8        |
|          |           |               | Cerebrum      | 25.1        | 31.2           | 28.3        |
|          |           |               | Nasal conchae | 36.5        | nd             | nd          |
|          |           |               | Lung caudal   | 39.2        | nd             | nd          |
|          |           | KZ7413        | Cerebellum    | 27.9        | nd             | 31.4        |
|          |           |               | Cerebrum      | 18.3        | 26.3           | 23.8        |
|          |           |               | Nasal conchae | 35.4        | nd             | nd          |
|          |           | KZ7411        | Nasal conchae | 30.7        | 38.2           | nd          |
|          |           |               | Lung caudal   | 31.1        | 36.6           | 35.5        |
|          |           |               | Lung cranial  | 31.7        | 38.2           | 35.3        |
|          |           | QE7300 (5dpc) | Cerebellum    | 27.3        | nd             | 30.4        |
|          |           |               | Cerebrum      | 20.3        | 25.7           | 22.4        |
|          |           |               | Nasal conchae | 26.9        | 32.8           | 31.9        |
|          |           |               | Trachea       | 34.1        | nd             | 37.6        |
|          |           |               | Lung caudal   | 22          | 25.5           | 24.1        |
|          |           |               | Lung cranial  | 20.7        | 25.8           | 24.5        |
|          |           | VI9302 (5dpc) | Cerebellum    | 24.4        | 29.1           | 26          |
|          |           |               | Cerebrum      | 16.9        | 22.7           | 20          |
|          |           |               | Nasal conchae | 24.5        | 29.8           | 28.9        |
|          |           |               | Trachea       | 33.2        | nd             | nd          |
|          |           |               | Lung caudal   | 19          | 22.8           | 21.1        |
|          |           |               | Lung cranial  | 20.1        | 23.9           | 22.3        |
| sham     | B.1.351.  | VI9305        | Cerebellum    | 26.5        | 33.4           | 28.4        |
|          |           |               | Cerebrum      | 25.1        | 30             | 26.5        |
|          |           |               | Nasal conchae | 31.5        | 36.4           | 36.6        |
|          |           |               | Trachea       | 38.3        | nd             | nd          |
|          |           |               | Lung caudal   | 39.6        | -              | -           |
|          |           | KZ7416        | Cerebellum    | 35.8        | nd             | nd          |
|          |           |               | Cerebrum      | 38.9        | nd             | nd          |
|          |           |               | Nasal conchae | 30.7        | nd             | 34.8        |
|          |           |               | Trachea       | 37.7        | nd             | nd          |



|              |               |                  |               |               |               |      |
|--------------|---------------|------------------|---------------|---------------|---------------|------|
|              |               |                  | Lung caudal   | 28.9          | 33.9          | 31.6 |
|              |               |                  | Lung cranial  | 26.3          | 32            | 29.4 |
|              |               | VI9306<br>(7dpc) | Cerebellum    | 19.7          | 23.9          | 20.1 |
|              |               |                  | Cerebrum      | 19.3          | 24.2          | 20.6 |
|              |               |                  | Nasal conchae | 35.3          | nd            | nd   |
|              |               |                  | Trachea       | 39.8          | -             | -    |
|              |               |                  | Lung caudal   | 38.4          | nd            | nd   |
|              |               |                  | Lung cranial  | 37.2          | nd            | 39.8 |
|              |               | KZ7412<br>(7dpc) | Cerebellum    | 20.7          | 24.5          | 22.3 |
|              |               |                  | Cerebrum      | 18.5          | 23.5          | 21.2 |
|              |               |                  | Nasal conchae | 29.1          | 36.3          | 34.1 |
|              |               |                  | Trachea       | 32.7          | nd            | 39.4 |
|              |               |                  | Lung caudal   | 36.6          | nd            | nd   |
|              |               |                  | Lung cranial  | 33.5          | nd            | 38.4 |
|              |               | VI9315<br>(7dpc) | Cerebellum    | 17.6          | 21.2          | 18.2 |
|              |               |                  | Cerebrum      | 20.6          | 25.9          | 23.1 |
|              |               |                  | Nasal conchae | 37.2          | nd            | nd   |
|              |               |                  | Trachea       | 36.9          | nd            | nd   |
| Lung caudal  | 39.4          |                  | nd            | nd            |               |      |
| Lung cranial | 25.7          |                  | 30            | 28.5          |               |      |
| CVnCoV       | B.1.351.      | KY5553           | Nasal conchae | 39.1          | nd            | nd   |
|              |               |                  | KY5554        | Nasal conchae | 37            | nd   |
|              |               | VK1636           | Nasal conchae | 34.5          | nd            | nd   |
|              |               | VK1633           | Cerebrum      | 39.6          | nd            | nd   |
|              |               |                  | Nasal conchae | 32.7          | nd            | 37.7 |
|              |               |                  | Lung cranial  | 38.1          | nd            | nd   |
|              |               | QE7314           | Nasal conchae | 39            | nd            | nd   |
|              |               |                  | Lung cranial  | 39.4          | nd            | nd   |
| CV2CoV 8µg   | B.1.351.      | KZ6841           | Nasal conchae | 38            | nd            | nd   |
|              |               |                  | FT9314        | Nasal conchae | 38.2          | nd   |
|              |               | KZ6850           | Nasal conchae | 34.3          | nd            | nd   |
|              |               | AO5179           | Nasal conchae | 37.5          | nd            | nd   |
|              |               | FT9309           | Nasal conchae | 36.7          | nd            | nd   |
|              |               |                  | Lung caudal   | 37.6          | nd            | nd   |
|              |               |                  | Lung cranial  | 36.2          | nd            | nd   |
|              |               | CV2CoV 2µg       | B.1.351.      | AO8968        | Nasal conchae | 37.3 |
| VK1074       | Nasal conchae |                  |               |               | 38            | nd   |
| VK1076       | Nasal conchae |                  |               | 32.9          | nd            | nd   |
| VK1067       | Nasal conchae |                  |               | 38.5          | nd            | nd   |
| AO8965       | Nasal conchae |                  |               | 34.6          | nd            | nd   |
|              | Lung cranial  |                  |               | 38.8          | nd            | nd   |

|                 |          |        |               |      |      |      |
|-----------------|----------|--------|---------------|------|------|------|
|                 |          | AO8977 | Nasal conchae | 34.3 | nd   | nd   |
|                 |          | VK1077 | Cerebrum      | 38   | nd   | nd   |
|                 |          |        | Nasal conchae | 29.9 | 36.9 | 35.8 |
| CV2CoV<br>0.5µg | B.1.351. | AO5160 | Nasal conchae | 38.5 | nd   | nd   |
|                 |          | KY5557 | Cerebellum    | 39.1 | nd   | nd   |
|                 |          | QE6769 | Nasal conchae | 38.3 | nd   | nd   |
|                 |          |        | Lung caudal   | 39.1 | nd   | nd   |
|                 |          |        | Lung cranial  | 39.1 | nd   | nd   |
|                 |          | AO5163 | Nasal conchae | 39.3 | nd   | nd   |
|                 |          | FU7019 | Nasal conchae | 38.5 | nd   | nd   |
|                 |          | AO5166 | Nasal conchae | 31.7 | nd   | 38.6 |
|                 |          | AO5177 | Nasal conchae | 39.2 | nd   | nd   |

35 nd: not detected; -: not tested

36

37

38 Table S7: Primer and probes used to detect genomic RNA and sgRNA from SARS-CoV-2 ORF7a

|                                                                                                                                                                                                                                                                                                                                                            | <b>sequence (5'-3')</b>                     | <b>position*</b> | <b>amplicon</b> |
|------------------------------------------------------------------------------------------------------------------------------------------------------------------------------------------------------------------------------------------------------------------------------------------------------------------------------------------------------------|---------------------------------------------|------------------|-----------------|
| RdRp gene / nCoV_IP4 ( <a href="https://www.who.int/docs/default-source/coronaviruse/real-time-rt-pcr-assays-for-the-detection-of-sars-cov-2-institut-pasteur-paris.pdf?sfvrsn=3662fcb6_2">https://www.who.int/docs/default-source/coronaviruse/real-time-rt-pcr-assays-for-the-detection-of-sars-cov-2-institut-pasteur-paris.pdf?sfvrsn=3662fcb6_2</a> ) |                                             |                  |                 |
| nCoV_IP4-14059Fw                                                                                                                                                                                                                                                                                                                                           | GGT AAC TGG TAT GAT TTC G                   | 14080-14098      | 107 bp          |
| nCoV_IP4-14146Rv                                                                                                                                                                                                                                                                                                                                           | CTG GTC AAG GTT AAT ATA GG                  | 14186-14167      |                 |
| nCoV_IP4-14084Probe(+)                                                                                                                                                                                                                                                                                                                                     | FAM-TCATACAAACCACGCCAGG-BHQ-1               | 14105-14123      |                 |
| sgRNA ORF7a                                                                                                                                                                                                                                                                                                                                                |                                             |                  |                 |
| sgRNA-Lead-2F                                                                                                                                                                                                                                                                                                                                              | CCA GGT AAC AAA CCA ACC AAC T               | 20-41            | 133bp           |
| sgRNA-ORF7a-2R                                                                                                                                                                                                                                                                                                                                             | ACC TCT AAC ACA CTC TTG GTA G               | 27471-27450      |                 |
| sgRNA-ORF7a-2FAM                                                                                                                                                                                                                                                                                                                                           | FAM-TCT TGG CAC TGA TAA CAC TCG CTA CT-BHQ1 | 27410-27435      |                 |

39 \*position according to accession number NC\_045512

40

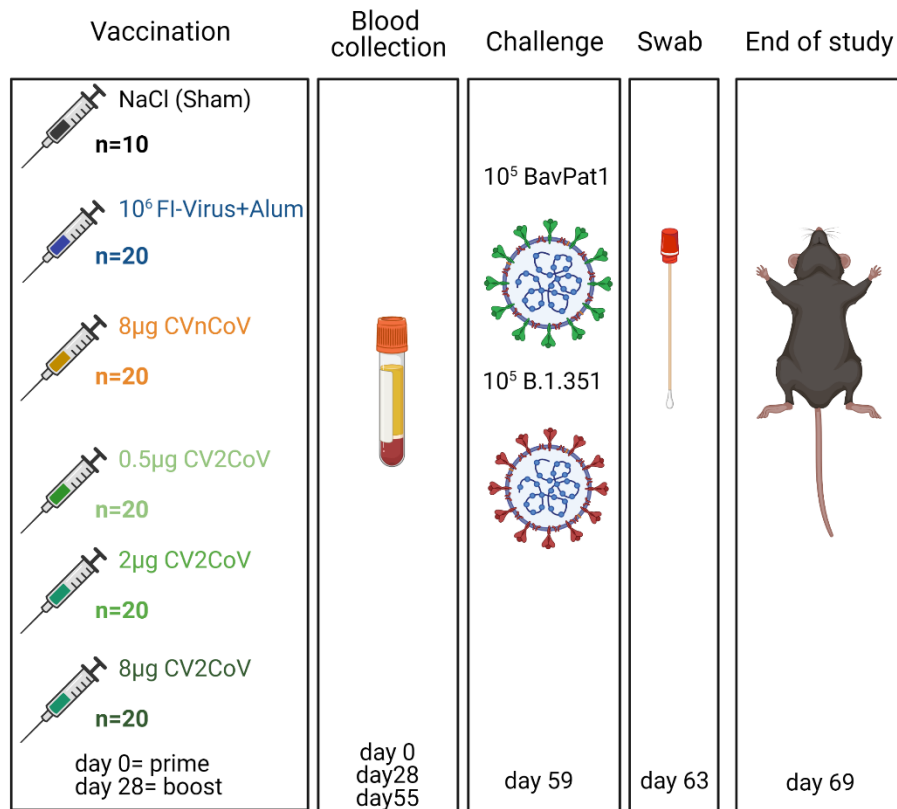

42

43 **Fig.S1. Experimental design.** K18-hACE2 mice were either vaccinated at day 0 (prime) and day 28  
 44 (boost) i.m. with 20µl of 8µg CVnCoV, 0.5µg CV2CoV, 2µg CV2CoV, 8µg CV2CoV or received 20µl  
 45 NaCl (Sham) or 20µl of 10<sup>6</sup> TCID<sub>50</sub> FI-Virus+2% Alhydrogel® in PBS which served as control groups.  
 46 Blood samples were collected at day 0, day 28 and day 55. Mice were either challenged with 10<sup>5</sup> SARS-  
 47 CoV-2 BavPat1 (Sham n=4, FI-Virus n=10, CVnCoV n=10) or 10<sup>5</sup> B.1.351 (Sham n=5, FI-Virus n=10,  
 48 CVnCoV n=10) at day 59 for a total of 10 days. An oral swab was taken at day 4. Viral load was  
 49 determined in selected organs at day 10 or when animals reached the humane endpoint of the study.  
 50 Image was generated using the illustration software Biorender (Biorender.com)

51

52

53 Fig. S2

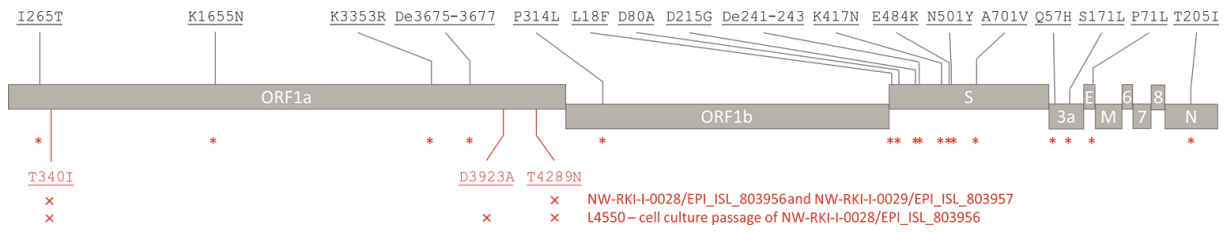

54

55

56 **Fig.S2 Cell culture passage of the VOC B.1.351 NW-RKI-I-0028 strain did not alter genome**

57 **sequence of the challenge virus stock L4550.** All characteristic mutations of VOC B.1.351 (upper

58 panel) were detected in the deeply sequenced stock of the challenge virus B.1.351 NW-RKI-I-0028

59 (L4550) as marked by red asterisks. Additional alterations for the B.1.351 NW-RKI-I-0028 and NW-

60 RKI-I-0029 strains and L4550 cell culture passage are shown (lower panel). Mean coverage of the virus

61 genome sequence of L4550 was 13,184 ( $\pm$  7,958.4) reads. No single nucleotide polymorphism variants

62 were detected in the mutations (L18F, D80A, D215G, deletion De241-243, K417N, E484K, N501Y,

63 A701V) and in the cleavage site of the spike glycoprotein.

64

65

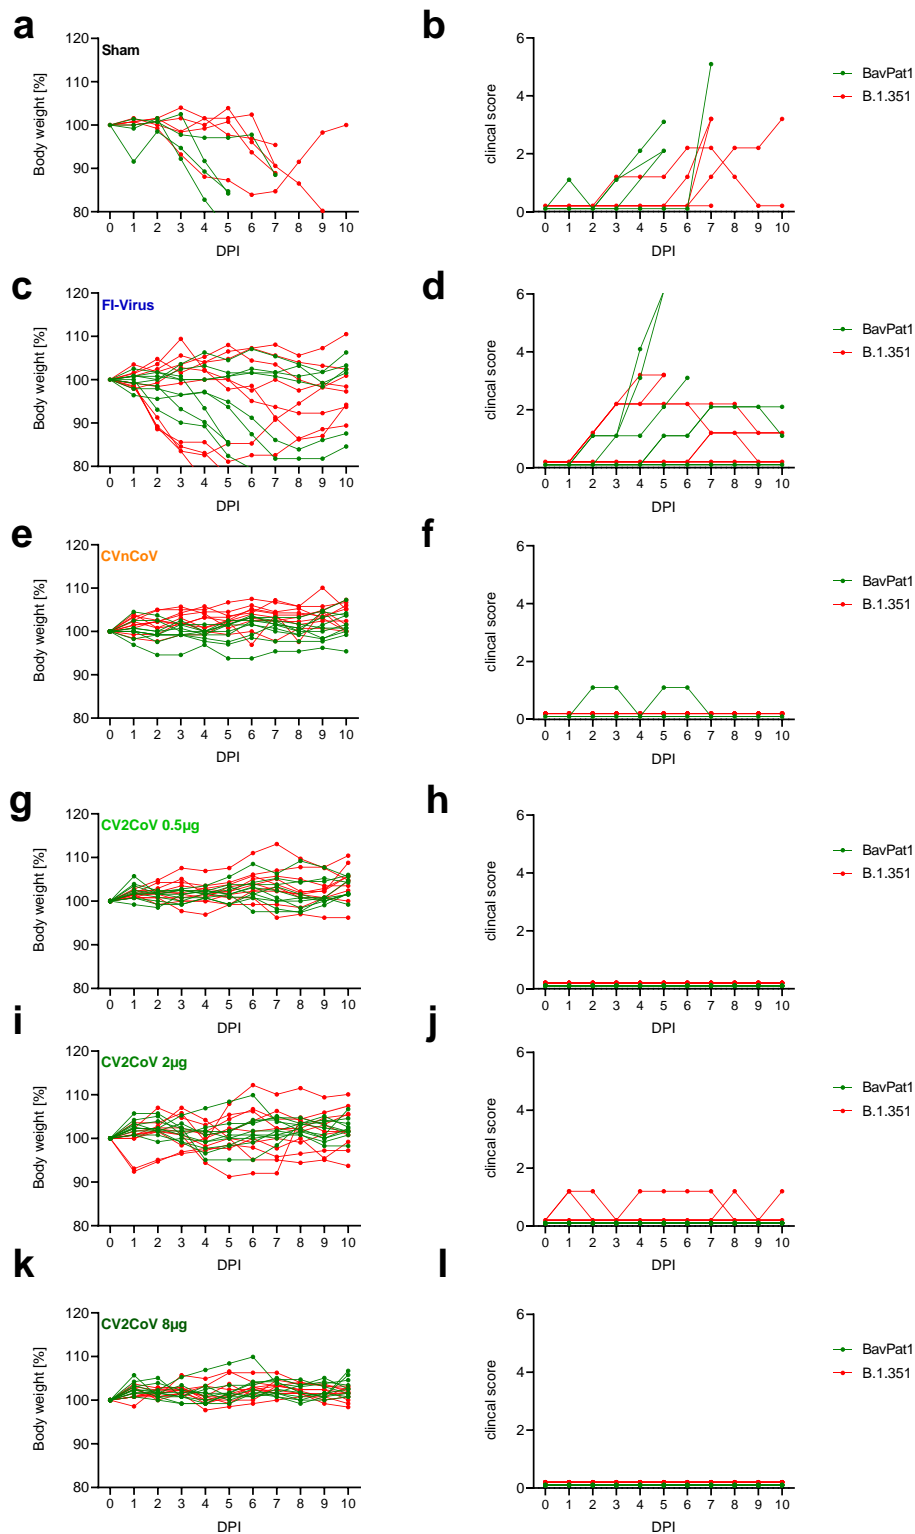

72 for K18-hACE2 mice in the (**A** and **B**) SHAM, (**C** and **D**) FI-Virus, (**E** and **F**) CVnCoV, (**G** and **H**)  
73 CV2CoV 0.5 $\mu$ g, (**G** and **H**) CV2CoV 2 $\mu$ g, and (**G** and **H**) CV2CoV 8 $\mu$ g groups was monitored daily.  
74 Lines represent individual animals over the course of the experiment (BavPat1 = green; B.1.351 =  
75 red).
